# Supplementary material
Source: PubMed Central journal article supplement (PMC6302328)
Supplement: CJN.00800118SupplementaryData.pdf [file CJN.00800118SupplementaryData.pdf]

# **Epidemiology of acute kidney injury among hospitalized children in China**

## **Supplements**

### **METHOD**

#### **AGE- AND SEX- SPECIFIC REFERENCE VALUE OF SERUM CREATININE IN CHILDREN**

We selected from the total study population 718,158 children with at least one serum creatinine measurement, excluding those with any of the following conditions during the hospitalization: any kidney diseases, dehydration, diarrhea, sepsis, shock, respiratory failure, heart failure, malnutrition, need intensive care, or death during hospitalization. We log-transformed value of the first available creatinine test in each selected child and estimated the sex-specific smoothed curves of serum creatinine with respect to age, and used the estimated geometric mean of creatinine given age and sex as the age- and sex-standardized reference value. The age- and sex- specific reference value for serum creatinine can be approximated by the equation:  $(5 \times \text{age} - 16) \mu\text{mol/L}$  for boys aged more than 13 years and  $(2 \times \text{age} + 21) \mu\text{mol/L}$  for all others.

**Table S1. Characteristics of the total pediatric population**

|                                              | Included in the analysis set<br>n=101,836 (11%) | Excluded from the analysis set<br>n=846,018 (89%) |
|----------------------------------------------|-------------------------------------------------|---------------------------------------------------|
| Age (years)                                  | 4.7 (5)                                         | 4.4 (4)                                           |
| Infancy (1 month-1 year)                     | 33,402 (33)                                     | 200,504 (24)                                      |
| Childhood (2-10 year)                        | 50,107 (49)                                     | 534,557 (64)                                      |
| Adolescence (11-18 year)                     | 18,327 (18)                                     | 102,862 (12)                                      |
| Male                                         |                                                 |                                                   |
| Male                                         | 61,565 (61)                                     | 533,560 (64)                                      |
| Female                                       | 40,271 (40)                                     | 304,363 (36)                                      |
| Location                                     |                                                 |                                                   |
| Central                                      | 47,181 (46)                                     | 385,396 (46)                                      |
| Northern                                     | 27,786 (27)                                     | 235,826 (28)                                      |
| Southern                                     | 26,869 (26)                                     | 216,701 (26)                                      |
| Hospital type                                |                                                 |                                                   |
| Children hospital                            | 63,124 (62)                                     | 644,375 (77)                                      |
| General hospital                             | 38,712 (38)                                     | 193,548 (23)                                      |
| In-hospital death                            | 1188 (1)                                        | 1411 (0.2)                                        |
| Need intensive care                          | 14,587 (14)                                     | 21,308 (3)                                        |
| Length of stay (days)                        | 14 (9, 21)                                      | 7 (4, 10)                                         |
| Clinical settings                            |                                                 |                                                   |
| Respiratory infection                        | 33,445 (33)                                     | 269,105 (32)                                      |
| Non-cardiac surgery                          | 32,142 (32)                                     | 310,816 (37)                                      |
| Congenital heart disease/<br>cardiac surgery | 20,462 (20)                                     | 36,974 (4)                                        |
| Anemia                                       | 7385 (7)                                        | 18,268 (2)                                        |
| Sepsis                                       | 6544 (6)                                        | 14,768 (2)                                        |
| Diarrhea/dehydration                         | 6323 (6)                                        | 36,420 (4)                                        |
| Glomerulonephritis                           | 5550 (5)                                        | 12,937 (2)                                        |
| CKD <sup>#</sup>                             | 51 (0.01)                                       | 97 (0.05)                                         |
| Heart failure                                | 5200 (5)                                        | 7172 (0.9)                                        |
| Respiratory failure                          | 4154 (4)                                        | 4444 (0.5)                                        |
| Trauma/burn                                  | 3882 (4)                                        | 15,002 (2)                                        |
| Epilepsy                                     | 3581 (4)                                        | 47,368 (6)                                        |
| Intestinal obstruction                       | 2846 (3)                                        | 8127 (1)                                          |
| Malnutrition                                 | 2028 (2)                                        | 5727 (0.7)                                        |
| Shock                                        | 1743 (2)                                        | 1330 (0.2)                                        |
| Urinary tract obstruction                    | 1474 (1)                                        | 4845 (0.6)                                        |
| Urinary tract infection                      | 1263 (1)                                        | 5918 (0.7)                                        |
| Hypoxic ischemic encephalopathy              | 669 (0.7)                                       | 1495 (0.2)                                        |

\* Age (years) is expressed in mean (sd); length of stay is expressed in median (q25,q75); other data are expressed in N (%).

# CKD: physician-diagnosed chronic kidney disease stage 3-4, given by ICD10 codes: N18.803, N18.804

**Table S2. Cumulative incidence of AKI and diagnosis rate by diagnostic code**

|                        | N       | CA-AKI<br>N (%) | HA-AKI<br>N (%) | Total AKI<br>N (%) | AKI diagnosis rate*, N<br>(%) |
|------------------------|---------|-----------------|-----------------|--------------------|-------------------------------|
| <b>All patients</b>    | 101,836 | 7,220 (7)       | 12,688 (13)     | 20,006 (20)        | 712 (4)                       |
| <b>Age<sup>#</sup></b> |         |                 |                 |                    |                               |
| Infant                 | 32,804  | 2,974 (9)       | 6,082 (19)      | 9,056 (28)         | 118 (1)                       |
| Childhood              | 50,600  | 3,196 (6)       | 5,493 (11)      | 8,689 (17)         | 354 (4)                       |
| Adolescent             | 18,432  | 1,050 (6)       | 1,113 (6)       | 21,63 (12)         | 240 (11)                      |
| <b>Hospital type</b>   |         |                 |                 |                    |                               |
| Children               | 63,124  | 4,561 (7)       | 9,055 (14)      | 13,616 (22)        | 457 (3)                       |
| General                | 38,712  | 2,659 (7)       | 3,633 (9)       | 6,292 (16)         | 255 (4)                       |
| <b>Location</b>        |         |                 |                 |                    |                               |
| Central                | 47,181  | 3,751 (8)       | 6,752 (14)      | 10,503 (22)        | 486 (5)                       |
| North                  | 27,786  | 1,900 (7)       | 2,425 (9)       | 4,325 (16)         | 139 (3)                       |
| South                  | 26,869  | 1,569 (6)       | 3,511 (13)      | 5,080 (19)         | 87 (2)                        |

\*AKI diagnosis rate was calculated the percentage of AKI by diagnostic code from the admission and discharge record among the AKI cases identified based on the serum creatinine change.

<sup>#</sup>Infant, childhood, and adolescent were defined as age of <1, 2-5, and 11-18 years, respectively.

Abbreviation: CA-AKI, community acquired AKI; HA-AKI, hospital acquired AKI

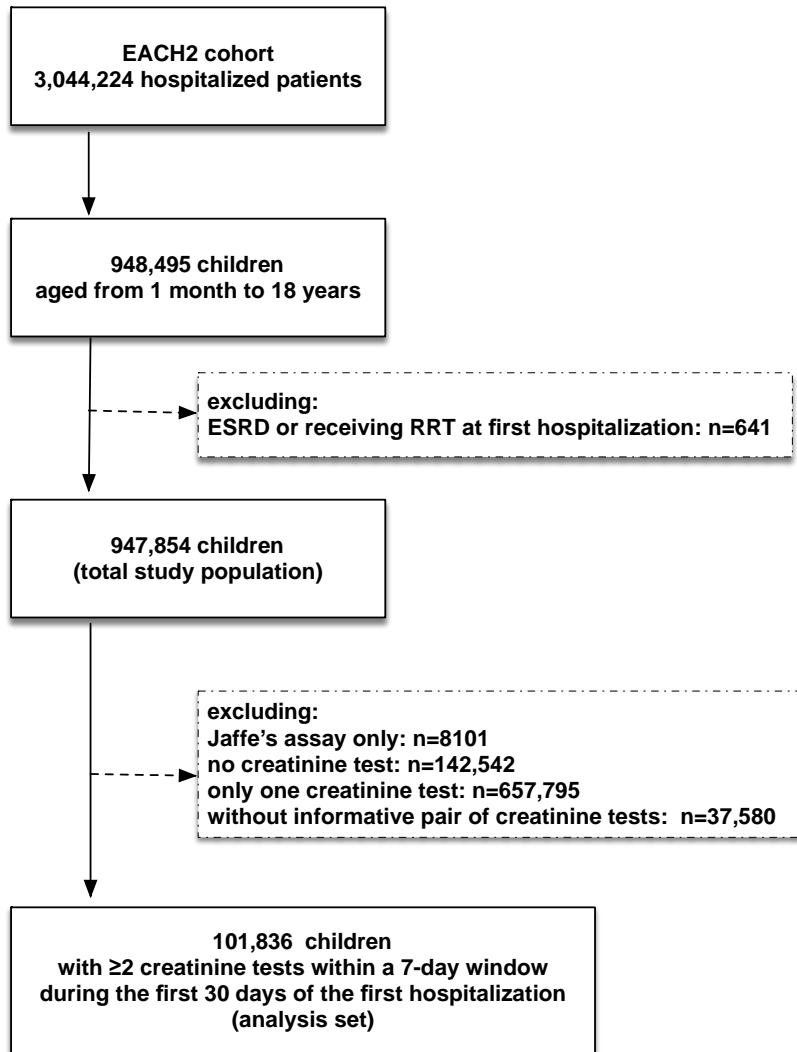

**Figure S1. Study population and the analysis set**

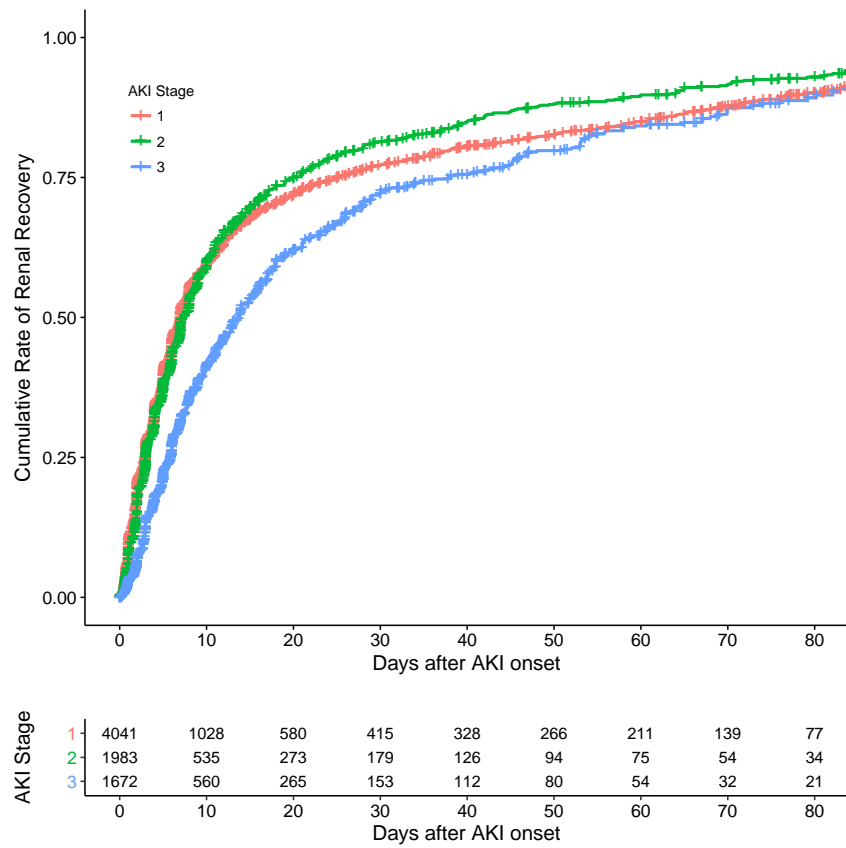

**Figure S2. Kaplan Meier Curves of cumulative renal recovery of hospital acquired AKI by AKI stages**

## **Appendix - List of Analyzed Drugs**

### **Proton Pump Inhibitors**

Omeprazole  
Lansoprazole  
Pantoprazole  
Esomeprazole  
Rabeprazole

### **Aminoglycoside Antibiotic**

Gentamicin  
Amikacin  
Tobramycin  
Streptomycin  
Etimicin

### **Antiepileptic Drugs**

Sodium Valproate  
Phenobarbital  
Carbamazepine  
Oxcarbazepine  
Levetiracetam  
Lamotrigine  
Topiramate  
Clonazepam  
Pregabalin  
Zonisamide  
Gabapentin  
Phenytoin Sodium

### **Antituberculosis Drugs**

Isoniazid  
Pyrazinamide  
Rifampin  
Isoniazid Aminosalicylate Tablets  
Ethambutol

### **Antifungal Drugs**

Fluconazole  
Itraconazole  
Voriconazole  
Amphotericin B  
Caspofungin  
Amphotericin  
Micafungin Net  
Miconazole  
Flucytosine  
Ketoconazole  
Caspofungin Acetate

### **Antiviral Drugs**

Ganciclovir

Vidarabine  
Ribavirin  
Acyclovir  
Oseltamivir  
Lamivudine  
Valacyclovir  
Foscarnet Sodium  
Penciclovir  
Entecavir  
Adefovir Dipivoxil  
Telbivudine

### **Chemotherapeutic Drugs**

Vindesine  
Daunorubicin  
Etoposide  
Cisplatin  
Cyclophosphamide  
Topotecan  
Ifosfamide  
Vincristine  
Carboplatin  
Pegaspargase  
Cytarabine  
Mitoxantrone  
Fluorouracil  
Doxorubicin  
Rituximab  
Methotrexate  
Sirolimus  
Idarubicin  
Mercaptopurine  
Cladribine  
Pirarubicin  
Pingyangmycin  
Doxorubicin  
Methotrexate  
Epirubicin  
Bevacizumab  
Paclitaxel  
Bleomycin  
Bleomycin  
Dacarbazine  
Arsenic Trioxide  
Hydroxyurea  
Actinomycin D  
Nedaplatin  
Gemcitabine  
Retinoic Acid  
Asparaginase  
Temozolomide  
Oxaliplatin



Tegafur, Gimeracil And Oteracil Potassium  
Thioguanine  
Ubenimex  
Camptothecin  
Aclarubicin  
Harringtonine  
Mannatide  
Calcium Levofolinate  
Fludarabine  
Brucea Javanica Oil  
Docetaxel  
Arsenious Acid  
Rukuaixiao

### **Contrast Media**

Urografin  
Iohexol  
Iopamidol  
Gadodiamide  
Iopromide  
Ioversol  
Acetone  
Iodized Oil  
Gadopentetate Dimeglumine  
Iodixanol

### **Nonsteroid Anti-Inflammatory Drug**

Ibuprofen  
Acetaminophen  
Aspirin  
Compound Paracetamol And Methylephedrine Oral Solution  
Diclofenac  
Indomethacin  
Compound Pseudoephedrine Hydrochloride  
Paracetamol Suppositories  
Paracetamol, Pseudoephedrine Hydrochloride,  
Dextromethorphan Hydrobromide And Chlorphenamine Maleate Tablets  
Sodium Salicylate  
Pediatric Paracetamol, Artificial Cow-Bezoar And Chlorphenamine Maleate  
Paracetamol, Caffeine, Artificial Cow-Bezoar And Chlorphenamine Maleate  
Compound Aminophenazone And Barbitol  
Glucosamine  
Pseudoephedrine Hydrochloride, Chlorpheniramine Maleate  
And Dextromethorphan Hydrobromide  
Acetaminophen Oral Solution  
Dexibuprofen  
Flurbiprofen  
Etoricoxib  
Parecoxib Sodium  
Acetaminophen Oral Solution  
Compound Indomethacin Tincture  
Paracetamol Solution

Celecoxib  
Propacetamol  
Superoxide Dismutase  
Meloxicam

**Other Antibiotics**

Vancomycin  
Teicoplanin  
Sulfonamide  
Trimethoprim and Sulfamethoxazole  
Compound Sulfamethoxazole

## **Appendix - List of Participating Hospitals**

1. Nanfang Hospital, Southern Medical University, Guangzhou, China;
2. The First Affiliated Hospital of Zhengzhou University, Zhengzhou, China;
3. West China Second University Hospital, Sichuan University, Chengdu, China;
4. Sichuan Provincial People's Hospital, University of Electronic Science and Technology of China, Chengdu, China;
5. Guangdong General Hospital, Guangdong Academy of Medical Sciences, Guangzhou, China;
6. Children's Hospital of Chongqing Medical University, Chongqing, China;
7. Guizhou Provincial People's Hospital, Guizhou University, Guiyang, China;
8. The Second Affiliated Hospital, Zhejiang University, Hangzhou, China;
9. Guilin Medical University Affiliated Hospital, Guilin, China;
10. Tongji Hospital Affiliated to Tongji Medical College, Huazhong University of Science and Technology, Wuhan, China;
11. The First Affiliated Hospital, Zhejiang University, Hangzhou, China;
12. The First Affiliated Hospital of Shenzhen University, Shenzhen University, Shenzhen, China;
13. The Second Affiliated Hospital of Dalian Medical University, Dalian, China;
14. Huashan Hospital, Fudan University, Shanghai, China;
15. Zhong Da Hospital, Nanjing, China;
16. Sun Yat-sen Memorial Hospital, Sun Yat-sen University, Guangzhou, China;
17. Children's Hospital of Nanjing Medical University, Nanjing, China;
18. The Children Hospital of Zhejiang University, Hangzhou, China;
19. Anhui Provincial Children's Hospital, Hefei, China;
20. Guangzhou Women and Children's Medical Center, Guangzhou Medical University, Guangzhou, China;
21. Children's Hospital of Fudan University, Shanghai, China;
22. Chengdu Women and Children's Central Hospital, Chengdu, China;
23. Shanghai Children's Medical Center, Shanghai Jiaotong University, Shanghai, China;
24. Jinan Children's Hospital, Jinan, China;
25. Lanzhou University Second Hospital, Lanzhou, China.

## **Appendix - List of Diagnosis Codes**

**Congenital heart disease/ Cardiac surgery:** Q24.9, O99.89, I97.110, I97.120, I97.130, I97.710, I97.790, I97.810, I97.820

**Glomerulonephritis:** N00.2, N00.3, N00.4, N00.5, N00.7, N01.2, N01.4, N01.5, N01.7, N02.2, N02.3, N02.4, N02.5, N02.7, N03.2, N03.3, N03.4, N03.5, N03.7, N04.2, N04.3, N04.4, N04.5, N04.7, N05.2, N05.3, N05.4, N05.5, N05.7, N06.2, N06.3, N06.4, N06.5, N06.7, N07.2, N07.3, N07.4, N07.5, N07.7

**Respiratory failure:** J95.821, J95.822, J96.00, J96.01, J96.02, J96.10, J96.11, J96.12, J96.20, J96.21, J96.22, J96.90, J96.91, J96.92, P28.5

**Shock:** A48.3, O03.31, O03.81, O04.81, O07.31, O08.3, O75.1, R45.7, R57.0, R57.1, R57.8, R57.9, R65.21, T75.01, T78.2, T79.4, T81.1, T81.11, T81.12, T81.19, T88.2, Y63.4, Y84.3

**Heart failure:** I09.81, I11.0, I13.0, I13.2, I50.2, I50.3, I50.4, I50.8, I50.9, I97.13

**Urinary tract obstruction:** N13.0, N13.2, N32.0, N13.5, N13.8, N13.9

**Diabetes:** E08.00, E08.01, E08.1, E08.2, E08.3, E08.4, E08.5, E08.6, E08.8, E08.9, E09.0, E09.1, E09.2, E09.3, E09.4, E09.5, E09.6, E09.8, E09.9, E10.1, E10.2, E10.3, E10.4, E10.5, E10.6, E10.8, E10.9, E11.0, E11.1, E11.2, E11.3

**Diarrhea:** K58.0, K59.1, P78.3, R19.7

**Dehydration:** P74.1, T67.3, E86.0

**Sepsis:** A02.1, A22.7, A26.7, A32.7, A40, A41.0, A41.1, A41.2, A41.3, A41.4, A41.5, A41.8, A41.9, A42.7, A54.86, B37.7, O03.37, O03.87, O04.87, O07.37, O08.82, O85, P36, R65.2

**Respiratory infection:** J06.9, J22, J44.0, J47.0

**Intestinal obstruction:** K50.012, K50.112, K50.812, K50.912, K51.012, K51.212, K51.312, K51.412, K51.512, K51.812, K56.5, K56.60, K56.69, K91.3, P76

**Trauma:** G89.11, G89.21, H05.33, H05.42, H40.3, H61.31, K08.11, K08.41, K08.81, K08.82, M18.3, M87.2, O71.8, O71.9, T79.8, T79.9, Z87.828, Z91.49

**Burn:** T20.00, T20.01, T20.02, T20.03, T20.04, T20.05, T20.06, T20.07, T20.09, T20.1, T20.2, T20.3, T21.0, T21.1, T21.2, T21.3, T22.0

**Anemia:** D46.0, D46.1, D46.2, D46.4, D50, D51, D52, D53, D55, D56, D57.4, D58, D59, D61, D62, D63, D64

**Malnutrition:** E43, E44, E45, E46, E64.0, O25.1, O25.2, O25.3

**Epilepsy:** G40.00, G40.01, G40.1, G40.2, G40.3, G40.4, G40.80, G40.90, G40.91, G40.B0, G40.B1, Z82.0

**Hypoxic ischemic encephalopathy:** P91.60, P91.61, P91.62

**Urinary tract infection:** N39.0, P39.3

**Preterm:** O42.01, O42.11, O42.91, O60.1, O60.2, P07.3, P59.0

**Hematological malignancy:** C90, C91, C92, C93, C94, C95, C81, C82, C83, C84, C85, C86
